# Supplementary material for: CoMoO4·0.9H2O nanorods grown on reduced graphene oxide as advanced electrochemical pseudocapacitor materials
Source: Royal Society of Chemistry journal article supplement (doi:10.1039/c4ra04827j), 2014-07-25
Supplement: c4ra04827j1.pdf [file c4ra04827j1.pdf]

**CoMoO<sub>4</sub>·0.9H<sub>2</sub>O Nanorods Grown on Reduced Graphene Oxide as Advanced  
Electrochemical Pseudocapacitor Materials**

Kaibing Xu<sup>a†</sup>, Jie Chao<sup>a†</sup>, Wenyao Li<sup>a,c</sup>, Qian Liu<sup>a</sup>, Zhijie Wang<sup>a</sup>, Xijian Liu<sup>a</sup>, Rujia  
Zou<sup>a,b\*</sup> and Junqing Hu<sup>a\*</sup>

<sup>a</sup> State Key Laboratory for Modification of Chemical Fibers and Polymer Materials,  
College of Materials Science and Engineering, Donghua University, Shanghai 201620,  
China.

<sup>b</sup> Center of Super-Diamond and Advanced Films (COSDAF), Department of Physics  
and Materials Science, City University of Hong Kong, Hong Kong.

<sup>c</sup> School of material engineering, Shanghai university of engineering science,  
Shanghai 201620, China.

E-mail: hu.junqing@dhu.edu.cn, rjzou@dhu.edu.cn.

†These authors contributed equally to this work

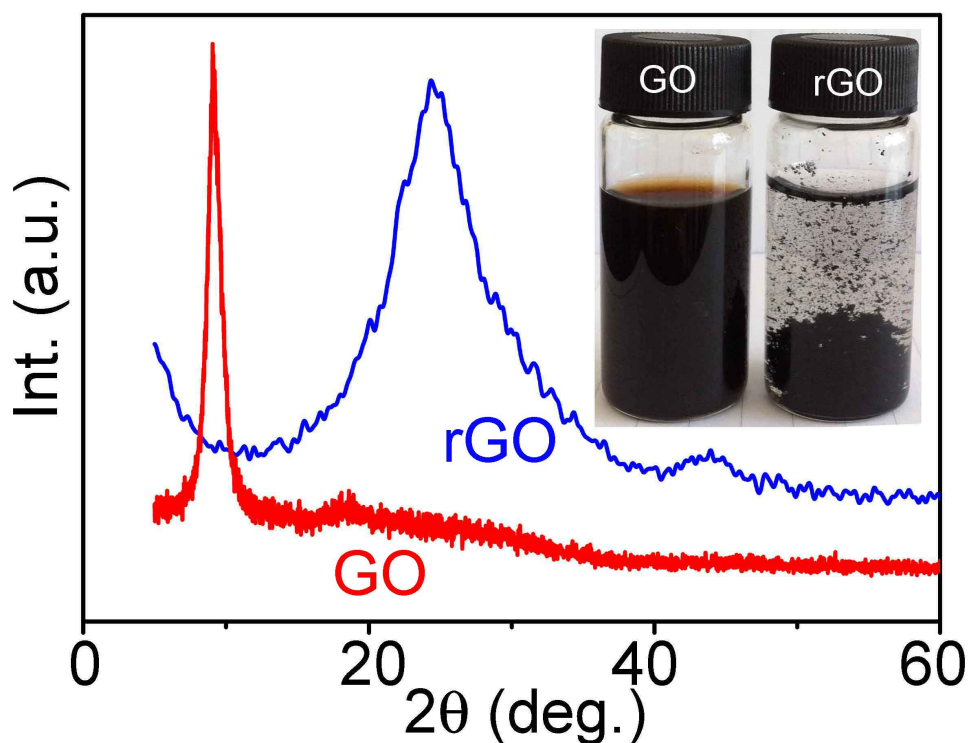

Figure S1. Powder XRD patterns of homogeneous GO aqueous dispersion before and after hydrothermal reduction at 180 °C for 15h, insert shows the corresponding photograph.

In order to further demonstrate the GO can be reduced to rGO during hydrothermally treated, we performed an experiment. In a typical synthetic procedure, 30 mg of graphene oxide was dispersed in 45 mL deionized water by ultrasonication for 2 h to form a homogeneous suspension, as-obtained solution was transferred into a 50 mL polytetrafluoroethylene (PTFE) (Teflon)-lined autoclave and maintained at 180 °C for 15 h in an electric oven. After being cooled to room temperature naturally, the precipitate was collected and washed with deionized water and ethanol for several times by centrifugation, then dried at 60 °C overnight. Clearly, the color of GO solution changed from light brown to black (insert in Figure S2) after hydrothermally treated. The black color is evident of the partial restoration of the conjugation network

within the carbon structure.[1] Figure S2 shows the powder XRD patterns of GO and rGO samples. For GO, a strong peak at  $9.1^\circ$  is observed, indicating the (002) plane of GO.[2] However, after hydrothermal process, the (002) peak shifts to around  $24.5^\circ$ , demonstrating that the GO was reduced to graphene.

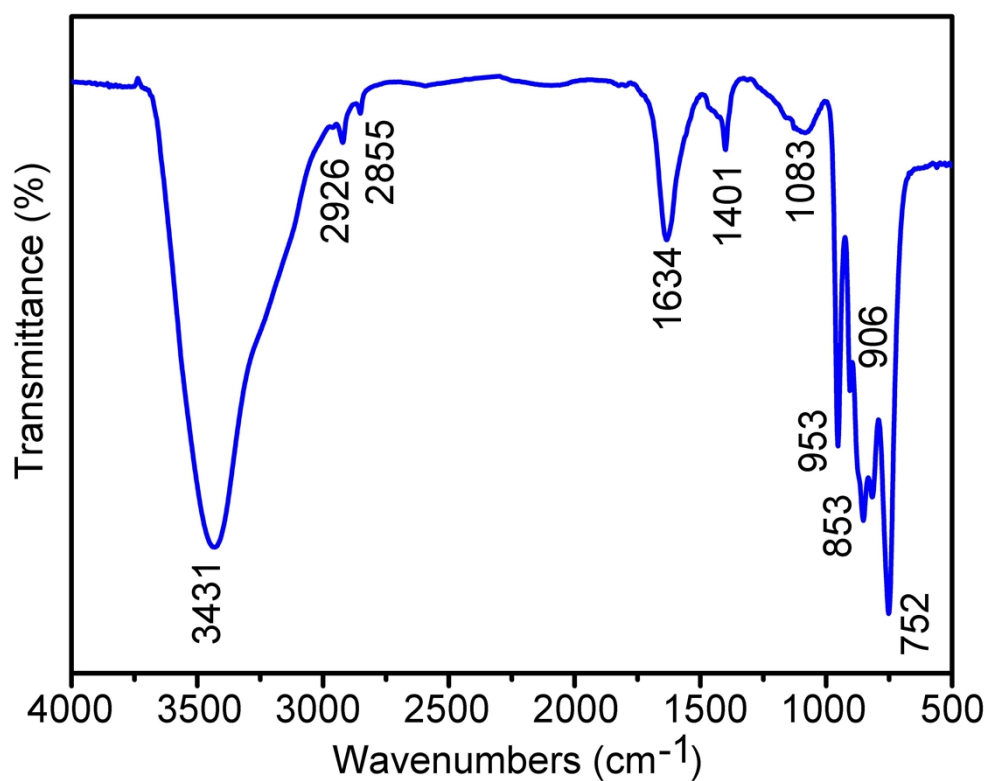

Figure S2. FTIR spectra of as-prepared  $\text{CoMoO}_4 \cdot 0.9\text{H}_2\text{O}/\text{rGO}$  hybrid composites.

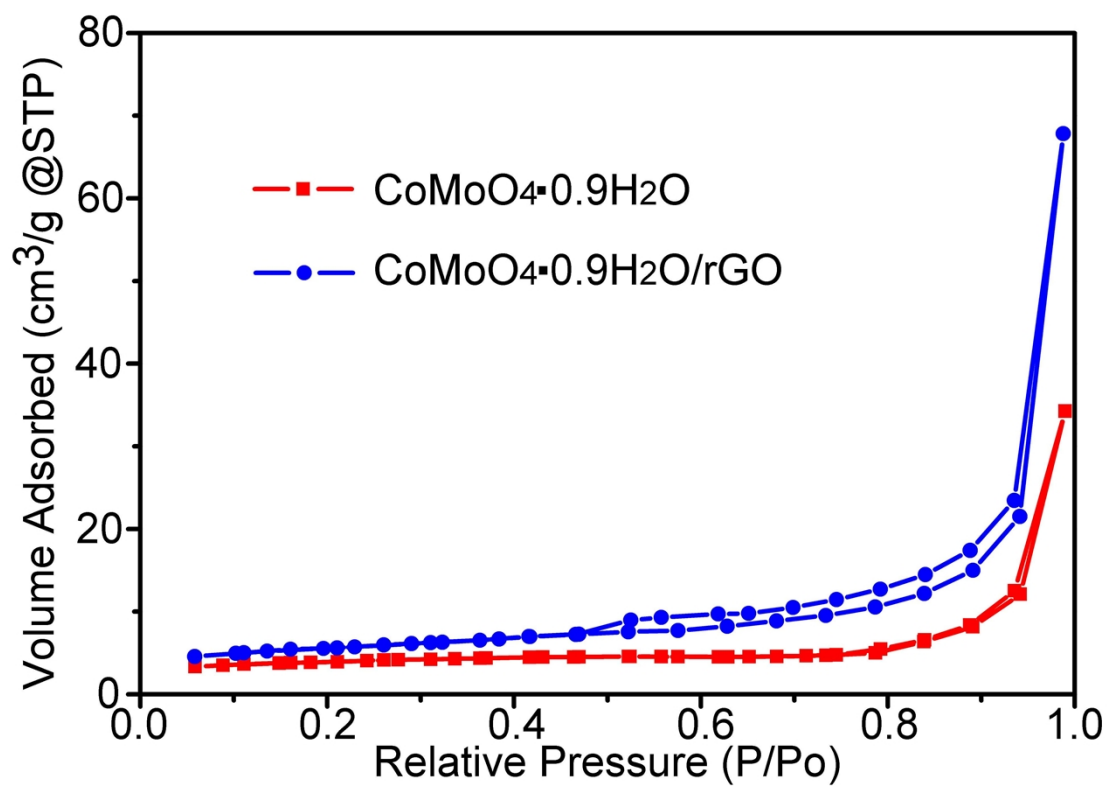

Figure S3. Nitrogen adsorption-desorption isotherms of the CoMoO<sub>4</sub>·0.9H<sub>2</sub>O and CoMoO<sub>4</sub>·0.9H<sub>2</sub>O/ rGO hybrid composites.

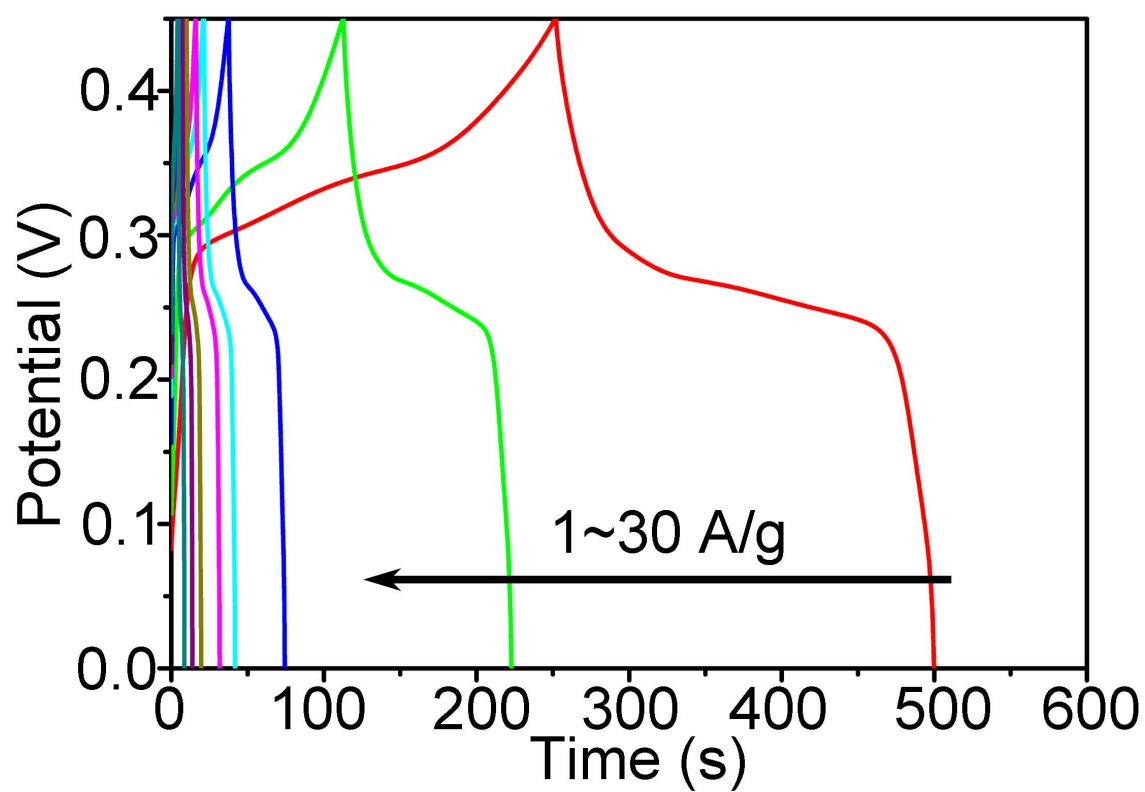

Figure S4. Charge-discharge behavior of the  $\text{CoMoO}_4 \cdot 0.9\text{H}_2\text{O}$  at different current densities.

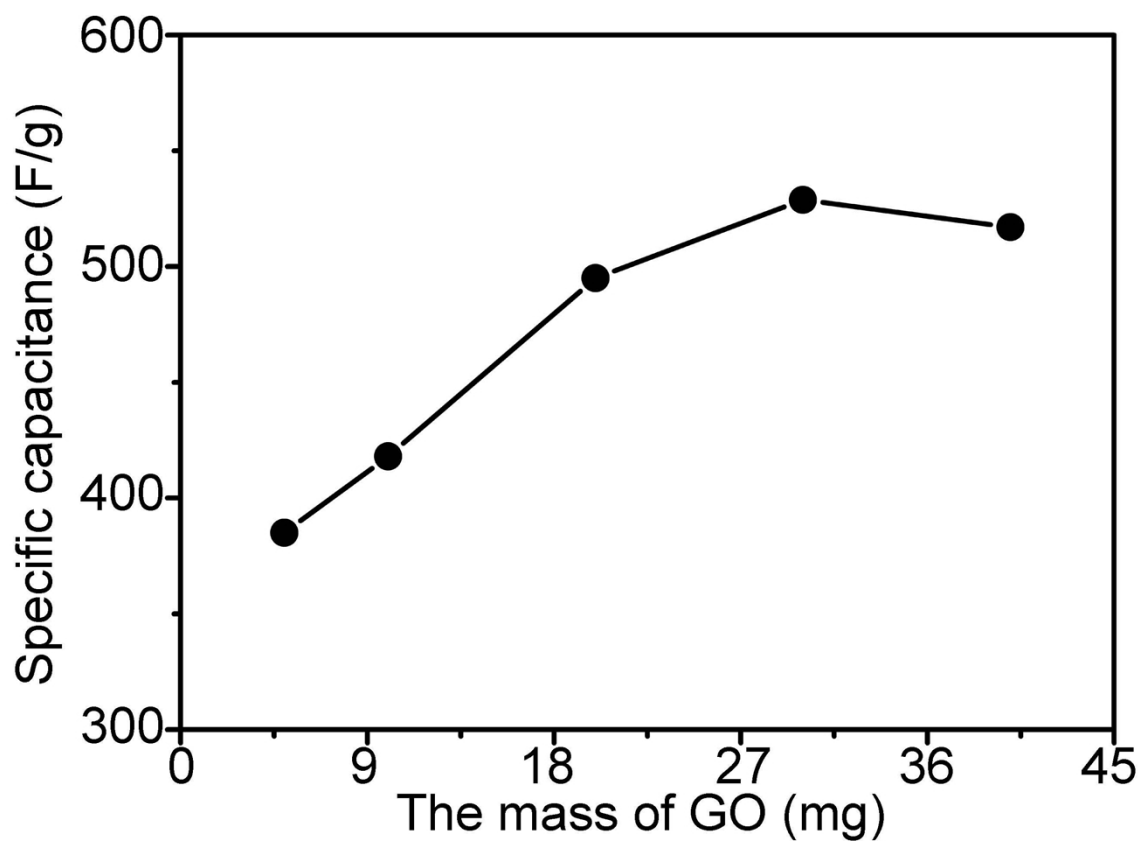

Figure S5. The specific capacitance of the  $\text{CoMoO}_4 \cdot 0.9\text{H}_2\text{O}/\text{rGO}$  hybrid composites as a function of different mass of GO.

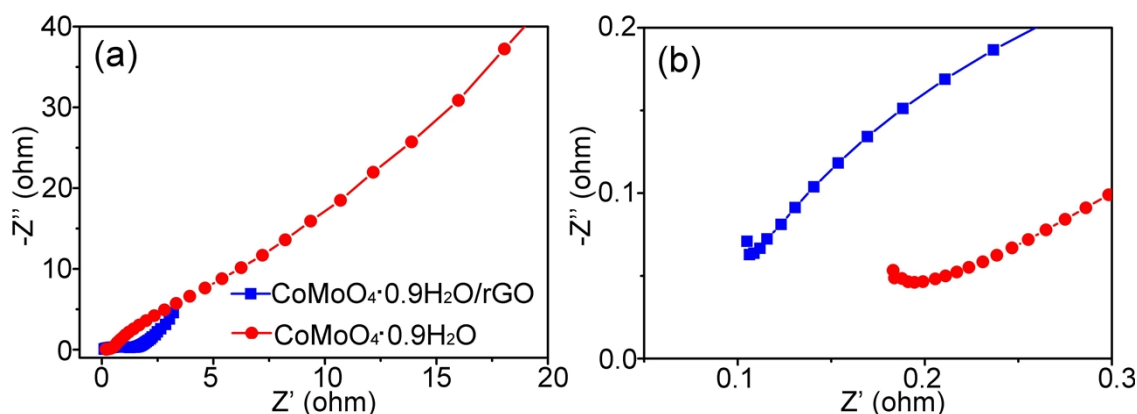

Figure S6. (a) EIS spectra and (b) the corresponding magnified high-frequency regions of the  $\text{CoMoO}_4 \cdot 0.9\text{H}_2\text{O}$  and  $\text{CoMoO}_4 \cdot 0.9\text{H}_2\text{O}/\text{rGO}$  hybrid composites.

Electrochemical impedance spectroscopy (EIS) has been applied to investigate electrical conductivity and ion transfer of the supercapacitor electrodes. Figure S6 shows the Nyquist impedance spectra of the  $\text{CoMoO}_4 \cdot 0.9\text{H}_2\text{O}$  and  $\text{CoMoO}_4 \cdot 0.9\text{H}_2\text{O}/\text{rGO}$  composites electrode materials. The EIS results demonstrate that equivalent series resistance of the  $\text{CoMoO}_4 \cdot 0.9\text{H}_2\text{O}/\text{rGO}$  electrode ( $0.105 \, \Omega$ ) is much smaller than that of the  $\text{CoMoO}_4 \cdot 0.9\text{H}_2\text{O}$  electrode ( $0.18 \, \Omega$ ), showing the improved conductivity of the  $\text{CoMoO}_4 \cdot 0.9\text{H}_2\text{O}/\text{rGO}$  electrode after the introduction of rGO.

## References

1. Y. Zhou, Q. L. Bao, L. A. L. Tang, Y. L. Zhong, K. P. Loh, *Chem. Mater.*, 2009, **21**, 2950.

2. W. B. Yue, S. H. Jiang, W. J. Huang, Z. Q. Gao, J. Li, Y. Ren, X. H. Zhao, X. J.

Yang, *J. Mater. Chem. A*, 2013, **1**, 6928.
